# Supplementary material for: Androgen receptor and its correlation with estrogen and progesterone receptors, aimed for identification of cases for future anti-androgen therapy in endometrial cancers
Source: PubMed Central journal article supplement (PMC10508627; doi:10.1371/journal.pone.0291361), 2023-09-19
Supplement: pone.0291361.s001.pdf [file pone.0291361.s001.pdf]

**S1 Table.** Summary of the demographic information, diagnostic characteristics, and immunohistochemical reactions of the three receptors plus MMR, p53, BMI values, and months of survival after the initial diagnosis in the patients with endometrial cancers

| No. | Age | Diagnosis | FIGO | ER      |           | PR      |           | AR      |           | MMR    | p53 | BMI   | M-Alive | Rx    |
|-----|-----|-----------|------|---------|-----------|---------|-----------|---------|-----------|--------|-----|-------|---------|-------|
|     |     |           |      | Cells % | Intensity | Cells % | Intensity | Cells % | Intensity |        |     |       |         |       |
| 1   | 70  | EEC       | 1    | 80%     | 3+        | 40%     | 2+        | 50%     | 2+        | Intact | WT  | 29.19 | 77 §    | No    |
| 2   | 68  | EEC       | 1    | 60%     | 3+        | 80%     | 3+        | 70%     | 3+        | Intact | WT  | 31.37 | 75 §    | No    |
| 3   | 80  | EEC       | 1    | 30%     | 1+        | 50%     | 2+        | 60%     | 2+        | Loss1  | AE  | 23.08 | 75 §    | No    |
| 4   | 69  | EEC       | 1    | 70%     | 3+        | 70%     | 2+        | 90%     | 3+        | Intact | AE  | 31.09 | 74 §    | No    |
| 5   | 67  | EEC       | 1    | 60%     | 1+        | 80%     | 3+        | 60%     | 2+        | Loss1  | NP  | 45.00 | 71 §    | No    |
| 6   | 54  | EEC       | 1    | 80%     | 2+        | 80%     | 3+        | 70%     | 2+        | Intact | NP  | 34.54 | 49 §    | No    |
| 7   | 65  | EEC       | 1    | 70%     | 2+        | 90%     | 2+        | 90%     | 2+        | Intact | WT  | 33.66 | 49 §    | No    |
| 8   | 88  | EEC       | 1    | 70%     | 2+        | 40%     | 3+        | 90%     | 3+        | Intact | WT  | 21.05 | 34 §    | Ch    |
| 9   | 74  | EEC       | 1    | 90%     | 3+        | 90%     | 3+        | 40%     | 3+        | Intact | WT  | 24.87 | 27 §    | No    |
| 10  | 60  | EEC       | 1    | 60%     | 2+        | 60%     | 2+        | 60%     | 2+        | Intact | NP  | 46.27 | 24 §    | No    |
| 11  | 64  | EEC       | 1    | Neg     |           | Neg     |           | Neg     |           | Loss1  | WT  | 26.67 | 22 §    | No    |
| 12  | 76  | EEC       | 1    | 85%     | 3+        | 80%     | 3+        | 80%     | 3+        | Intact | NP  | 19.61 | 21 §    | No    |
| 13  | 62  | EEC       | 1    | 30%     | 3+        | 30%     | 3+        | 30%     | 3+        | Intact | WT  | 22.72 | 21 §    | No    |
| 14  | 67  | EEC       | 1    | 90%     | 3+        | 90%     | 3+        | 90%     | 3+        | Intact | NP  | 34.09 | 20 §    | No    |
| 15  | 57  | EEC       | 1    | 65%     | 2+        | 70%     | 3+        | 10%     | 2+        | Intact | NP  | 46.99 | 19 §    | No    |
| 16  | 65  | EEC       | 1    | 65%     | 3+        | 60%     | 3+        | 70%     | 3+        | Intact | WT  | 42.84 | 17 §    | No    |
| 17  | 62  | EEC       | 1    | 80%     | 2+        | 80%     | 2+        | 70%     | 2+        | Intact | WT  | 45.16 | 17 §    | No    |
| 18  | 65  | EEC       | 1    | 70%     | 2+        | 40%     | 2+        | 70%     | 2+        | Intact | NP  | 24.60 | 16 §    | No    |
| 19  | 68  | EEC       | 1    | 90%     | 3+        | 90%     | 3+        | 90%     | 3+        | Intact | NP  | 43.64 | 15 §    | No    |
| 20  | 41  | EEC       | 1    | 90%     | 3+        | 70%     | 3+        | 60%     | 3+        | Intact | NP  | 29.29 | 12 §    | No    |
| 21  | 88  | EEC       | 2    | 40%     | 1+        | 10%     | 1+        | 10%     | 1+        | Intact | NP  | 36.57 | 30      | No    |
| 22  | 53  | EEC       | 2    | 30%     | 2+        | 50%     | 2+        | 50%     | 2+        | Intact | AE  | 22.53 | 74 §    | No    |
| 23  | 57  | EEC       | 2    | 70%     | 3+        | 70%     | 2+        | 20%     | 2+        | Intact | NP  | 34.07 | 57 §    | No    |
| 24  | 59  | EEC       | 2    | 40%     | 2+        | 80%     | 3+        | 40%     | 2+        | Intact | WT  | 42.57 | 46 §    | No    |
| 25  | 59  | EEC       | 2    | 50%     | 3+        | 80%     | 3+        | 50%     | 3+        | Loss2  | WT  | 27.50 | 40 §    | No    |
| 26* | 61  | EEC       | 2    | 85%     | 3+        | 65%     | 3+        | 80%     | 3+        | Intact | WT  | 27.81 | 38 §    | Ch+Hr |
| 27  | 61  | EEC       | 2    | 10%     | 3+        | 10%     | 3+        | 10%     | 3+        | Intact | NP  | 38.96 | 37 §    | No    |
| 28  | 69  | EEC       | 2    | 70%     | 2+        | 70%     | 2+        | 70%     | 2+        | Intact | WT  | 19.67 | 29 §    | Ch    |
| 29  | 70  | EEC       | 2    | 80%     | 3+        | 40%     | 3+        | 40%     | 3+        | Intact | WT  | 21.51 | 24 §    | No    |
| 30  | 69  | EEC       | 2    | 90%     | 3+        | 90%     | 3+        | 90%     | 3+        | Intact | WT  | 36.18 | 24 §    | No    |
| 31  | 50  | EEC       | 2    | 90%     | 3+        | 90%     | 3+        | 90%     | 3+        | Loss2  | WT  | 27.56 | 21 §    | No    |
| 32  | 58  | EEC       | 2    | 30%     | 2+        | 2%      | 2+        | 70%     | 2+        | Intact | WT  | 29.49 | 16 §    | No    |
| 33  | 42  | EEC       | 2    | 90%     | 3+        | 90%     | 3+        | 50%     | 2+        | Intact | WT  | 26.35 | 13 §    | No    |
| 34  | 84  | EEC       | 3    | 10%     | 2+        | 10%     | 2+        | 80%     | 2+        | Intact | WT  | 19.57 | 29 §    | Ch    |
| 35  | 75  | EEC       | 3    | 30%     | 1+        | 5%      | 1+        | 10%     | 3+        | Loss1  | WT  | 14.27 | 13      | Ch    |
| 36  | 59  | EEC       | 3    | 50%     | 2+        | 30%     | 2+        | 60%     | 2+        | Intact | WT  | 29.61 | 14 §    | Ch    |
| 37  | 78  | SCA       |      | Neg     |           | Neg     |           | Neg     |           | Intact | AE  | 26.35 | 34      | Ch    |
| 38  | 67  | SCA       |      | 10%     | 2+        | 20%     | 3+        | 90%     | 3+        | NP     | AE  | 67.67 | 67 §    | Ch    |
| 39  | 78  | SCA       |      | 70%     | 1+        | Neg     |           | 70%     | 3+        | Intact | AE  | 33.44 | 67 §    | NF    |
| 40  | 71  | SCA       |      | Neg     |           | Neg     |           | 90%     | 3+        | Intact | AE  | 33.82 | 63 §    | Ch    |
| 41  | 70  | SCA       |      | 40%     | 3+        | 5%      | 3+        | 5%      | 3+        | Intact | AE  | 32.01 | 54 §    | Ch    |
| 42  | 76  | SCA       |      | 95%     | 3+        | 25%     | 2+        | 95%     | 3+        | Intact | AE  | 29.51 | 51 §    | Ch    |
| 43  | 60  | SCA       |      | 80%     | 3+        | 75%     | 3+        | 90%     | 3+        | Intact | AE  | 32.19 | 36 §    | Ch    |
| 44  | 70  | SCA       |      | 95%     | 3+        | 95%     | 3+        | 40%     | 3+        | Intact | AE  | 30.91 | 31 §    | Ch    |
| 45  | 76  | SCA       |      | 90%     | 3+        | 10%     | 2+        | 90%     | 3+        | NP     | AE  | 25.08 | 3       | No    |
| 46  | 69  | SCA       |      | 20%     | 1+        | 15%     | 1+        | 90%     | 3+        | NP     | AE  | 35.43 | 21 §    | Ch    |
| 47  | 61  | SCA       |      | 20%     | 3+        | Neg     |           | 90%     | 3+        | Intact | AE  | 45.00 | 17 §    | Ch    |
| 48  | 68  | SCA       |      | 25%     | 3+        | 5%      | 2+        | 25%     | 3+        | Intact | AE  | 18.85 | 14 §    | Ch    |
| 49  | 61  | SCA       |      | 35%     | 1+        | Neg     |           | 95%     | 3+        | Intact | AE  | 45.00 | 12 §    | Ch    |
| 50  | 45  | CCCA      |      | Neg     |           | Neg     |           | Neg     |           | NP     | NP  | 22.75 | 75 §    | Ch    |
| 51  | 78  | CCCA      |      | Neg     |           | Neg     |           | 5%      | 3+        | Intact | AE  | 40.35 | 6       | Ch    |
| 52  | 67  | CCCA      |      | Neg     |           | Neg     |           | 5%      | 3+        | Intact | AE  | 37.11 | 16 §    | Ch    |
| 53  | 67  | CCCA      |      | Neg     |           | Neg     |           | 50%     | 3+        | Intact | AE  | 26.78 | 14 §    | Ch    |
| 54  | 58  | CCCA      |      | Neg     |           | Neg     |           | Neg     |           | Intact | AE  | 25.79 | 13 §    | Ch    |
| 55  | 64  | CCCA      |      | Neg     |           | Neg     |           | Neg     |           | Intact | AE  | 26.18 | 11 §    | Ch    |
| 56  | 73  | CS        |      | 10%     | 2+        | 10%     | 2+        | 10%     | 2+        | NP     | AE  | 27.57 | 13      | Ch    |
| 57  | 82  | CS        |      | Neg     |           | Neg     |           | 10%     | 1+        | Intact | AE  | 29.84 | 30      | Ch    |
| 58  | 81  | CS        |      | 3%      | 2+        | Neg     |           | 80%     | 3+        | Intact | NP  | 31.46 | 1       | No    |
| 59  | 65  | CS        |      | 40%     | 3+        | 10%     | 2+        | 40%     | 3+        | Intact | NP  | 24.89 | 27 §    | Ch    |
| 60  | 57  | CS        |      | Neg     |           | Neg     |           | 80%     | 2+        | Intact | AE  | 25.40 | 2       | No    |
| 61  | 63  | CS        |      | 30%     | 1+        | 25%     | 2+        | 70%     | 2+        | Intact | AE  | 22.62 | 13      | Ch    |
| 62  | 79  | DECA      |      | Neg     |           | Neg     |           | Neg     |           | Intact | AE  | 21.16 | 76 §    | Ch    |
| 63  | 54  | DECA      |      | Neg     |           | Neg     |           | Neg     |           | Loss1  | AE  | 25.28 | 4       | Ch    |
| 64  | 68  | DECA      |      | Neg     |           | Neg     |           | Neg     |           | Loss1  | AE  | 33.28 | 35 §    | Ch    |
| 65  | 53  | DECA      |      | Neg     |           | Neg     |           | Neg     |           | Loss1  | AE  | 30.09 | 33 §    | Ch    |
| 66  | 62  | DECA      |      | Neg     |           | Neg     |           | Neg     |           | Intact | AE  | 32.28 | 20 §    | Ch    |
| 67  | 83  | MNCA      |      | Neg     |           | Neg     |           | Neg     |           | Intact | WT  | 20.85 | 12      | Ch    |
| 68  | 60  | Met       | 1    | 90%     | 3+        | 90%     | 3+        | 60%     | 3+        | Intact | NP  | 37.08 | 43 §    | Ch+Hr |
| 69  | 70  | Met       | 2    | 80%     | 3+        | 60%     | 3+        | 90%     | 3+        | Loss1  | NP  | 44.34 | 33 §    | Ch    |
| 70  | 70  | Met       | 2    | 70%     | 3+        | 90%     | 3+        | 10%     | 2+        | Loss1  | NP  | 44.34 | 33 §    | Ch    |
| 71* | 63  | Met       | 2    | 95%     | 3+        | Neg     |           | 95%     | 3+        | Intact | WT  | 25.74 | 18 §    | Ch+Hr |

ER, estrogen receptor; PR, progesterone receptor; AR, androgen receptor, EEC, endometrial endometrioid cancer; SCA, serous carcinoma; CCCA, clear cell carcinoma; CS, carcinosarcoma; DECA, dedifferentiated/undifferentiated endometrial carcinoma; MNCA, mesonephric like carcinoma; Met, metastatic carcinoma; MMR, mismatch repair; Loss1, loss of MLH1 & PMS2; Loss2, loss of MSH2 & MSH6; WT, wild type; AE, aberrant expression; NP, not performed; BMI, body mass index (kg/m<sup>2</sup>), Red, obese (BMI ≥30), Orange, overweight (BMI ≥25 to <30), Blue, underweight (BMI <18.5); M-Alive, months alive (in Red, expired), § = still alive as of 2023-05-13; Rx, therapy; Ch, chemotherapy; Hr, hormonal therapy; NF, no follow-up; Blue highlight, patient was menstrual; \*, same patient.
